# Supplementary material for: E3 ubiquitin ligase RBX1 drives the metastasis of triple negative breast cancer through a FBXO45-TWIST1-dependent degradation mechanism
Source: Aging (Albany NY). 2022 Jul 8;14(13):5493–510. doi: 10.18632/aging.204163 (PMC9320552; doi:10.18632/aging.204163)
Supplement: Supplementary Figure 1 [file aging-14-204163-s001.pdf]

## SUPPLEMENTARY FIGURE

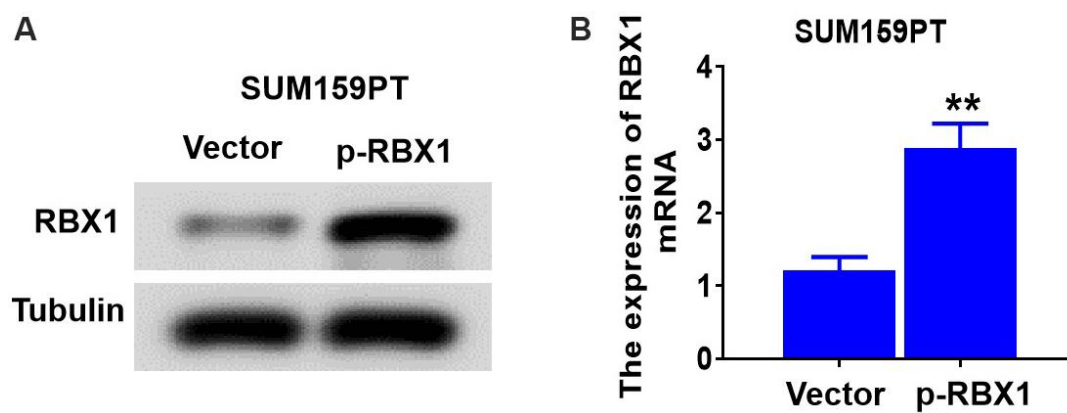

**Supplementary Figure 1. Overexpress RBX1 in SUM159PT cells.** (A, B) Western blot and qRT-peR analyses were used to detect the expression levels of RBX1 in SUM159PT cells stably transfected with the p-RBX1 plasmid. \* $P < 0.05$ , \*\* $P < 0.01$ .
